# Supplementary material for: Analysis of the chitin synthase gene family in Ganoderma lucidum: its structure, phylogeny, and expression patterns
Source: PeerJ. 2025 Nov 5;13:e20302. doi: 10.7717/peerj.20302 (PMC12595948; doi:10.7717/peerj.20302)
Supplement: Supplemental Information 2 [file peerj-13-20302-s002.xlsx]

## Sheet: Raw data
Sample Name	Gene Name	Ct	Ct	Ct	Actin Ct	Actin Ct	Actin Ct	Ct Mean	Actin Ct Mean	△Ct	△Ct Mean	△△Ct	2-△△Ct
MY	GlCS1	25.88	25.94	25.97	25.7	25.63	25.68	25.93	25.67	0.26	0.25	0.01	0.993092
MY	GlCS1	25.79	25.85	25.88	25.5	25.65	25.58	25.84	25.5767	0.263333	0.25	0.0133333	0.990801
MY	GlCS1	25.67	25.63	25.76	25.39	25.52	25.47	25.6867	25.46	0.226667	0.25	-0.0233333	1.0163
PR	GlCS1	25.27	25.33	25.36	25.48	25.5	25.25	25.32	25.41	-0.09	0.25	-0.34	1.26576
PR	GlCS1	25.19	25.26	25.28	25.31	25.43	25.38	25.2433	25.3733	-0.13	0.25	-0.38	1.30134
PR	GlCS1	25.23	25.2	25.32	25.24	25.38	25.26	25.25	25.2933	-0.0433333	0.25	-0.293333	1.22547
EA	GlCS1	24.82	24.98	25.11	25.62	25.95	25.7	24.97	25.7567	-0.786667	0.25	-1.03667	2.05148
EA	GlCS1	24.85	24.91	24.74	25.45	25.78	25.53	24.8333	25.5867	-0.753333	0.25	-1.00333	2.00463
EA	GlCS1	24.96	24.87	24.69	25.82	25.64	25.58	24.84	25.68	-0.84	0.25	-1.09	2.12874
MA	GlCS1	26.09	26.13	26.14	25.56	25.61	25.53	26.12	25.5667	0.553333	0.25	0.303333	0.810378
MA	GlCS1	26.06	26.08	26.02	25.44	25.38	25.38	26.0533	25.4	0.653333	0.25	0.403333	0.756109
MA	GlCS1	26.01	26.02	26.04	25.34	25.16	25.19	26.0233	25.23	0.793333	0.25	0.543333	0.686184
MY	GlCS2	26.15	26.21	26.3	26.34	26.36	26.28	26.22	26.3267	-0.106667	-0.0988889	-0.00777778	1.00541
MY	GlCS2	26.28	26.14	26.43	26.26	26.38	26.32	26.2833	26.32	-0.0366667	-0.0988889	0.0622222	0.957788
MY	GlCS2	26.17	26.46	26.24	26.49	26.21	26.63	26.29	26.4433	-0.153333	-0.0988889	-0.0544444	1.03846
PR	GlCS2	26.16	26.22	26.31	26.67	26.56	26.54	26.23	26.59	-0.36	-0.0988889	-0.261111	1.1984
PR	GlCS2	26.19	26.12	26.24	26.49	26.59	26.61	26.1833	26.5633	-0.38	-0.0988889	-0.281111	1.21513
PR	GlCS2	26.34	26.06	26.17	26.62	26.48	26.78	26.19	26.6267	-0.436667	-0.0988889	-0.337778	1.26381
EA	GlCS2	24.74	24.93	24.81	26.56	26.35	26.43	24.8267	26.4467	-1.62	-0.0988889	-1.52111	2.87012
EA	GlCS2	24.63	24.89	24.78	26.44	26.26	26.36	24.7667	26.3533	-1.58667	-0.0988889	-1.48778	2.80457
EA	GlCS2	24.65	24.91	24.86	26.51	26.38	26.48	24.8067	26.4567	-1.65	-0.0988889	-1.55111	2.93043
MA	GlCS2	26.71	26.74	26.93	26.62	26.75	26.69	26.7933	26.6867	0.106667	-0.0988889	0.205556	0.867205
MA	GlCS2	26.86	26.95	26.78	26.86	26.84	26.75	26.8633	26.8167	0.0466667	-0.0988889	0.145556	0.904031
MA	GlCS2	26.82	26.84	26.96	26.51	26.87	26.67	26.8733	26.6833	0.19	-0.0988889	0.288889	0.818532
MY	GlCS3	25.46	25.28	25.23	25.24	25.19	25.57	25.3233	25.3333	-0.01	0.00888889	-0.0188889	1.01318
MY	GlCS3	25.45	25.36	25.18	25.49	25.31	25.26	25.33	25.3533	-0.0233333	0.00888889	-0.0322222	1.02259
MY	GlCS3	25.64	25.55	25.37	25.6	25.42	25.36	25.52	25.46	0.06	0.00888889	0.0511111	0.965193
PR	GlCS3	25.13	25.24	25.26	25.38	25.5	25.44	25.21	25.44	-0.23	0.00888889	-0.238889	1.18008
PR	GlCS3	25.09	25.16	25.12	25.48	25.39	25.21	25.1233	25.36	-0.236667	0.00888889	-0.245556	1.18555
PR	GlCS3	25.12	25.07	25.09	25.41	25.31	25.23	25.0933	25.3167	-0.223333	0.00888889	-0.232222	1.17464
EA	GlCS3	25.12	25.23	25.25	25.38	25.4	25.34	25.2	25.3733	-0.173333	0.00888889	-0.182222	1.13463
EA	GlCS3	25.32	25.53	25.45	25.84	25.66	25.6	25.4333	25.7	-0.266667	0.00888889	-0.275556	1.21046
EA	GlCS3	25.35	25.48	25.37	25.76	25.58	25.52	25.4	25.62	-0.22	0.00888889	-0.228889	1.17193
MA	GlCS3	24.35	24.31	24.46	25.54	25.45	25.27	24.3733	25.42	-1.04667	0.00888889	-1.05556	2.07852
MA	GlCS3	24.21	24.15	24.61	25.33	25.28	25.48	24.3233	25.3633	-1.04	0.00888889	-1.04889	2.06894
MA	GlCS3	24.3	24.52	24.46	25.39	25.32	25.62	24.4267	25.4433	-1.01667	0.00888889	-1.02556	2.03574
MY	GlCS4	26.59	26.45	26.74	26.52	26.38	26.29	26.5933	26.3967	0.196667	0.206667	-0.01	1.00696
MY	GlCS4	26.77	26.53	26.65	26.58	26.32	26.54	26.65	26.48	0.17	0.206667	-0.0366667	1.02574
MY	GlCS4	26.64	26.71	26.6	26.39	26.48	26.32	26.65	26.3967	0.253333	0.206667	0.0466667	0.968171
PR	GlCS4	26.12	26.21	26.17	26.28	26.44	26.33	26.1667	26.35	-0.183333	0.206667	-0.39	1.31039
PR	GlCS4	26.13	25.99	26.28	26.31	26.39	26.51	26.1333	26.4033	-0.27	0.206667	-0.476667	1.39152
PR	GlCS4	26.25	26.11	26.4	26.36	26.45	26.45	26.2533	26.42	-0.166667	0.206667	-0.373333	1.29534
EA	GlCS4	26.22	26.28	26.17	26.34	26.63	26.47	26.2233	26.48	-0.256667	0.206667	-0.463333	1.37872
EA	GlCS4	26.31	26.16	26.19	26.44	26.73	26.39	26.22	26.52	-0.3	0.206667	-0.506667	1.42076
EA	GlCS4	26.17	26.23	26.15	26.55	26.54	26.46	26.1833	26.5167	-0.333333	0.206667	-0.54	1.45397
MA	GlCS4	26.32	26.28	26.37	26.39	26.35	26.77	26.3233	26.5033	-0.18	0.206667	-0.386667	1.30737
MA	GlCS4	26.28	26.24	26.36	26.5	26.36	26.65	26.2933	26.5033	-0.21	0.206667	-0.416667	1.33484
MA	GlCS4	26.36	26.38	26.32	26.61	26.47	26.76	26.3533	26.6133	-0.26	0.206667	-0.466667	1.38191
MY	GlCS5	27.46	27.7	27.92	27.73	27.89	27.81	27.6933	27.81	-0.116667	-0.09	-0.0266667	1.01866
MY	GlCS5	27.78	27.65	27.62	27.63	27.77	27.85	27.6833	27.75	-0.0666667	-0.09	0.0233333	0.983957
MY	GlCS5	27.75	27.67	27.54	27.6	27.84	27.78	27.6533	27.74	-0.0866667	-0.09	0.00333333	0.997692
PR	GlCS5	27.69	27.73	27.65	28.65	28.83	28.78	27.69	28.7533	-1.06333	-0.206667	-0.856667	1.81085
PR	GlCS5	27.78	27.57	27.49	28.63	28.86	28.69	27.6133	28.7267	-1.11333	-0.206667	-0.906667	1.87471
PR	GlCS5	27.74	27.65	27.44	28.72	28.67	28.74	27.61	28.71	-1.1	-0.206667	-0.893333	1.85746
EA	GlCS5	25.84	25.75	25.94	27.07	27.12	27.21	25.8433	27.1333	-1.29	-0.09	-1.2	2.2974
EA	GlCS5	25.62	25.71	25.93	27.09	27.02	27.14	25.7533	27.0833	-1.33	-0.09	-1.24	2.36199
EA	GlCS5	25.98	25.82	25.87	27.13	27.23	27.05	25.89	27.1367	-1.24667	-0.09	-1.15667	2.22942
MA	GlCS5	26.96	26.8	26.92	27.51	27.43	27.3	26.8933	27.4133	-0.52	-0.09	-0.43	1.34723
MA	GlCS5	26.81	26.85	26.73	27.23	27.48	27.21	26.7967	27.3067	-0.51	-0.09	-0.42	1.33793
MA	GlCS5	26.97	26.98	27.02	27.64	27.56	27.43	26.99	27.5433	-0.553333	-0.09	-0.463333	1.37872
MY	GlCS6	27.43	27.34	27.22	27.68	27.51	27.47	27.33	27.5533	-0.223333	-0.16	-0.0633333	1.04488
MY	GlCS6	27.51	27.45	27.27	27.64	27.55	27.52	27.41	27.57	-0.16	-0.16	1.19349e-15	1
MY	GlCS6	27.48	27.52	27.37	27.65	27.57	27.44	27.4567	27.5533	-0.0966667	-0.16	0.0633333	0.95705
PR	GlCS6	26.88	26.81	26.95	28.48	28.32	28.28	26.88	28.36	-1.48	-0.527778	-0.952222	1.93485
PR	GlCS6	26.91	26.78	26.92	28.48	28.45	28.23	26.87	28.3867	-1.51667	-0.527778	-0.988889	1.98466
PR	GlCS6	26.88	26.92	26.97	28.34	28.57	28.37	26.9233	28.4267	-1.50333	-0.527778	-0.975556	1.9664
EA	GlCS6	26.88	26.81	26.95	28.48	28.32	28.28	26.88	28.36	-1.48	-0.16	-1.32	2.49666
EA	GlCS6	26.91	26.78	26.92	28.48	28.45	28.23	26.87	28.3867	-1.51667	-0.16	-1.35667	2.56093
EA	GlCS6	26.88	26.92	26.97	28.34	28.57	28.37	26.9233	28.4267	-1.50333	-0.16	-1.34333	2.53737
MA	GlCS6	27.58	27.56	27.78	28.67	28.52	28.56	27.64	28.5833	-0.943333	-0.527778	-0.415556	1.33381
MA	GlCS6	27.74	27.63	27.69	28.71	28.54	28.58	27.6867	28.61	-0.923333	-0.527778	-0.395556	1.31545
MA	GlCS6	27.68	27.69	27.72	28.68	28.61	28.53	27.6967	28.6067	-0.91	-0.527778	-0.382222	1.30335
MY	GlCS7	28.93	28.97	28.82	28.86	29.05	29.09	28.9067	29	-0.0933333	-0.0766667	-0.0166667	1.01162
MY	GlCS7	28.96	28.84	28.89	29.02	29.06	28.93	28.8967	29.0033	-0.106667	-0.0766667	-0.03	1.02101
MY	GlCS7	28.92	28.89	29.01	28.93	28.97	29.01	28.94	28.97	-0.03	-0.0766667	0.0466667	0.968171
PR	GlCS7	27.56	27.67	27.46	28.86	28.91	28.87	27.5633	28.88	-1.31667	-0.0766667	-1.24	2.36199
PR	GlCS7	27.54	27.61	27.47	28.87	28.55	28.98	27.54	28.8	-1.26	-0.0766667	-1.18333	2.27101
PR	GlCS7	27.48	27.53	27.42	28.95	28.92	28.29	27.4767	28.72	-1.24333	-0.0766667	-1.16667	2.24492
EA	GlCS7	27.98	27.93	27.89	28.92	28.85	28.91	27.9333	28.8933	-0.96	-0.0766667	-0.883333	1.84463
EA	GlCS7	27.82	27.91	27.87	28.98	28.86	28.81	27.8667	28.8833	-1.01667	-0.0766667	-0.94	1.91853
EA	GlCS7	27.91	27.99	27.93	28.91	28.95	29.04	27.9433	28.9667	-1.02333	-0.0766667	-0.946667	1.92741
MA	GlCS7	28.53	28.61	28.57	28.81	29.04	29.08	28.57	28.9767	-0.406667	-0.0766667	-0.33	1.25701
MA	GlCS7	28.62	28.64	28.56	28.98	28.86	28.99	28.6067	28.9433	-0.336667	-0.0766667	-0.26	1.19748
MA	GlCS7	28.66	28.69	28.75	29.02	29.05	29.11	28.7	29.06	-0.36	-0.0766667	-0.283333	1.217
MY	GlCS8	28.35	28.53	28.58	28.28	28.46	28.51	28.4867	28.4167	0.07	0.09	-0.02	1.01396
MY	GlCS8	28.62	28.57	28.41	28.32	28.45	28.36	28.5333	28.3767	0.156667	0.09	0.0666667	0.954842
MY	GlCS8	28.77	28.42	28.26	28.53	28.37	28.42	28.4833	28.44	0.0433333	0.09	-0.0466667	1.03288
PR	GlCS8	27.61	27.84	27.73	28.85	28.68	28.32	27.7267	28.6167	-0.89	0.09	-0.98	1.97247
PR	GlCS8	27.46	27.67	27.65	28.58	28.42	28.38	27.5933	28.46	-0.866667	0.09	-0.956667	1.94082
PR	GlCS8	27.56	27.42	27.61	28.51	28.34	28.36	27.53	28.4033	-0.873333	0.09	-0.963333	1.94981
EA	GlCS8	27.35	27.24	27.28	28.45	28.29	28.25	27.29	28.33	-1.04	0.09	-1.13	2.18859
EA	GlCS8	27.17	27.06	27.13	28.47	28.51	28.39	27.12	28.4567	-1.33667	0.09	-1.42667	2.68825
EA	GlCS8	27.14	27.13	27.17	28.63	28.47	28.11	27.1467	28.4033	-1.25667	0.09	-1.34667	2.54324
MA	GlCS8	28.39	28.41	28.28	28.43	28.62	28.67	28.36	28.5733	-0.213333	0.09	-0.303333	1.23399
MA	GlCS8	28.45	28.36	28.42	28.49	28.68	28.72	28.41	28.63	-0.22	0.09	-0.31	1.23971
MA	GlCS8	28.35	28.22	28.29	28.75	28.58	28.22	28.2867	28.5167	-0.23	0.09	-0.32	1.24833
MY	GlCS1	25.88	25.94	25.97	25.7	25.63	25.68	25.93	25.67	0.26	0.25	0.01	0.993092
MY	GlCS1	25.79	25.85	25.88	25.5	25.65	25.58	25.84	25.5767	0.263333	0.25	0.0133333	0.990801
MY	GlCS1	25.67	25.63	25.76	25.39	25.52	25.47	25.6867	25.46	0.226667	0.25	-0.0233333	1.0163
MY-40	GlCS1	21.61	21.88	21.93	22.17	22.22	22.13	21.8067	22.1733	-0.366667	0.25	-0.616667	1.53333
MY-40	GlCS1	21.68	21.87	21.72	22.25	22.14	22.19	21.7567	22.1933	-0.436667	0.25	-0.686667	1.60956
MY-40	GlCS1	21.83	21.78	21.94	22.12	22.17	22.3	21.85	22.1967	-0.346667	0.25	-0.596667	1.51222
MY	GlCS2	26.15	26.21	26.3	26.34	26.36	26.28	26.22	26.3267	-0.106667	-0.0988889	-0.00777778	1.00541
MY	GlCS2	26.28	26.14	26.43	26.26	26.38	26.32	26.2833	26.32	-0.0366667	-0.0988889	0.0622222	0.957788
MY	GlCS2	26.17	26.46	26.24	26.49	26.21	26.63	26.29	26.4433	-0.153333	-0.0988889	-0.0544444	1.03846
MY-40	GlCS2	21.56	21.47	21.54	21.59	21.57	21.41	21.5233	21.5233	0	-0.0988889	0.0988889	0.933752
MY-40	GlCS2	21.36	21.51	21.47	21.54	21.48	21.61	21.4467	21.5433	-0.0966667	-0.0988889	0.00222222	0.998461
MY-40	GlCS2	21.56	21.67	21.69	21.64	21.52	21.71	21.64	21.6233	0.0166667	-0.0988889	0.115556	0.923027
MY	GlCS3	25.46	25.28	25.23	25.24	25.19	25.57	25.3233	25.3333	-0.01	0.00888889	-0.0188889	1.01318
MY	GlCS3	25.45	25.36	25.18	25.49	25.31	25.26	25.33	25.3533	-0.0233333	0.00888889	-0.0322222	1.02259
MY	GlCS3	25.64	25.55	25.37	25.6	25.42	25.36	25.52	25.46	0.06	0.00888889	0.0511111	0.965193
MY-40	GlCS3	25.88	25.82	25.7	26.65	26.69	26.64	25.8	26.66	-0.86	0.00888889	-0.868889	1.82626
MY-40	GlCS3	25.94	25.86	25.89	26.76	26.82	26.79	25.8967	26.79	-0.893333	0.00888889	-0.902222	1.86894
MY-40	GlCS3	25.89	25.66	25.79	26.59	26.42	26.76	25.78	26.59	-0.81	0.00888889	-0.818889	1.76405
MY	GlCS4	26.59	26.45	26.74	26.52	26.38	26.29	26.5933	26.3967	0.196667	0.206667	-0.01	1.00696
MY	GlCS4	26.77	26.53	26.65	26.58	26.32	26.54	26.65	26.48	0.17	0.206667	-0.0366667	1.02574
MY	GlCS4	26.64	26.71	26.6	26.39	26.48	26.32	26.65	26.3967	0.253333	0.206667	0.0466667	0.968171
MY-40	GlCS4	26.94	26.91	26.81	27.47	27.44	27.42	26.8867	27.4433	-0.556667	0.206667	-0.763333	1.69741
MY-40	GlCS4	26.9	26.83	26.99	27.53	27.48	27.36	26.9067	27.4567	-0.55	0.206667	-0.756667	1.68958
MY-40	GlCS4	26.96	26.77	26.88	27.33	27.53	27.47	26.87	27.4433	-0.573333	0.206667	-0.78	1.71713
MY	GlCS5	27.46	27.7	27.92	27.73	27.89	27.81	27.6933	27.81	-0.116667	-0.09	-0.0266667	1.01866
MY	GlCS5	27.78	27.65	27.62	27.63	27.77	27.85	27.6833	27.75	-0.0666667	-0.09	0.0233333	0.983957
MY	GlCS5	27.75	27.67	27.54	27.6	27.84	27.78	27.6533	27.74	-0.0866667	-0.09	0.00333333	0.997692
MY-40	GlCS5	27.43	27.69	27.85	27.39	27.41	27.33	27.6567	27.3767	0.28	-0.09	0.37	0.773782
MY-40	GlCS5	27.53	27.26	27.47	27.12	27.14	27.19	27.42	27.15	0.27	-0.09	0.36	0.779165
MY-40	GlCS5	27.35	27.53	27.48	27.14	27.16	27.17	27.4533	27.1567	0.296667	-0.09	0.386667	0.764895
MY	GlCS6	27.43	27.34	27.22	27.68	27.51	27.47	27.33	27.5533	-0.223333	-0.16	-0.0633333	1.04488
MY	GlCS6	27.51	27.45	27.27	27.64	27.55	27.52	27.41	27.57	-0.16	-0.16	9.99201e-16	1
MY	GlCS6	27.48	27.52	27.37	27.65	27.57	27.44	27.4567	27.5533	-0.0966667	-0.16	0.0633333	0.95705
MY-40	GlCS6	26.62	26.74	26.85	27.82	27.95	27.81	26.7367	27.86	-1.12333	-0.16	-0.963333	1.94981
MY-40	GlCS6	26.68	26.69	26.81	27.91	27.82	27.86	26.7267	27.8633	-1.13667	-0.16	-0.976667	1.96791
MY-40	GlCS6	26.59	26.71	26.73	27.59	27.99	27.87	26.6767	27.8167	-1.14	-0.16	-0.98	1.97247
MY	GlCS7	28.93	28.97	28.82	28.86	29.05	29.09	28.9067	29	-0.0933333	-0.0766667	-0.0166667	1.01162
MY	GlCS7	28.96	28.84	28.89	29.02	29.06	28.93	28.8967	29.0033	-0.106667	-0.0766667	-0.03	1.02101
MY	GlCS7	28.92	28.89	29.01	28.93	28.97	29.01	28.94	28.97	-0.03	-0.0766667	0.0466667	0.968171
MY-40	GlCS7	28.81	28.84	28.72	29.61	29.54	29.75	28.79	29.6333	-0.843333	-0.0766667	-0.766667	1.70133
MY-40	GlCS7	28.69	28.73	28.91	29.52	29.67	29.45	28.7767	29.5467	-0.77	-0.0766667	-0.693333	1.61702
MY-40	GlCS7	28.81	28.87	28.95	29.61	29.84	29.55	28.8767	29.6667	-0.79	-0.0766667	-0.713333	1.63959
MY	GlCS8	28.35	28.53	28.58	28.28	28.46	28.51	28.4867	28.4167	0.07	0.09	-0.02	1.01396
MY	GlCS8	28.62	28.57	28.41	28.32	28.45	28.36	28.5333	28.3767	0.156667	0.09	0.0666667	0.954842
MY	GlCS8	28.77	28.42	28.26	28.53	28.37	28.42	28.4833	28.44	0.0433333	0.09	-0.0466667	1.03288
MY-40	GlCS8	28.92	28.98	28.84	29.5	29.63	29.85	28.9133	29.66	-0.746667	0.09	-0.836667	1.78592
MY-40	GlCS8	28.64	28.79	28.83	29.62	29.59	29.47	28.7533	29.56	-0.806667	0.09	-0.896667	1.86176
MY-40	GlCS8	28.78	28.61	28.56	29.46	29.38	29.41	28.65	29.4167	-0.766667	0.09	-0.856667	1.81085

## Sheet: Relative expression
Gene Name：GlCS1							Gene Name：GlCS2							Gene Name：GlCS3
	Sample Name							Sample Name							Sample Name
	MY	PR	EA	MA				MY	PR	EA	MA				MY	PR	EA	MA
1	0.993092	1.26576	2.05148	0.810378			1	1.00541	1.1984	2.87012	0.867205			1	1.01318	1.18008	1.13463	2.07852
2	0.990801	1.30134	2.00463	0.756109			2	0.957788	1.21513	2.80457	0.904031			2	1.02259	1.18555	1.21046	2.06894
3	1.0163	1.22547	2.12874	0.686184			3	1.03846	1.26381	2.93043	0.818532			3	0.965193	1.17464	1.17193	2.03574
mean	1.00007	1.26419	2.06162	0.75089			mean	1.00055	1.22578	2.86837	0.863256			mean	1.00032	1.18009	1.17234	2.06107
SE	0.0115207	0.030995	0.0511735	0.0508362			SE	0.0331124	0.0277439	0.0513974	0.0350163			SE	0.0251333	0.00445249	0.0309588	0.0183282
Gene Name：GlCS4							Gene Name：GlCS5							Gene Name：GlCS6
	Sample Name							Sample Name							Sample Name
	MY	PR	EA	MA				MY	PR	EA	MA				MY	PR	EA	MA
1	1.00696	1.31039	1.37872	1.30737			1	1.01866	1.81085	2.2974	1.34723			1	1.04488	1.93485	2.49666	1.33381
2	1.02574	1.39152	1.42076	1.33484			2	0.983957	1.87471	2.36199	1.33793			2	1	1.98466	2.56093	1.31545
3	0.968171	1.29534	1.45397	1.38191			3	0.997692	1.85746	2.22942	1.37872			3	0.95705	1.9664	2.53737	1.30335
mean	1.00029	1.33242	1.41782	1.34137			mean	1.0001	1.84767	2.29627	1.35463			mean	1.00064	1.96197	2.53165	1.31754
SE	0.0239711	0.0422426	0.0307907	0.030781			SE	0.014268	0.0269738	0.0541266	0.0174565			SE	0.035858	0.0205728	0.0265464	0.0125243
Gene Name：GlCS7							Gene Name：GlCS8
	Sample Name							Sample Name
	MY	PR	EA	MA				MY	PR	EA	MA
1	1.01162	2.36199	1.84463	1.25701			1	1.01396	1.97247	2.18859	1.23399
2	1.02101	2.27101	1.91853	1.19748			2	0.954842	1.94082	2.68825	1.23971
3	0.968171	2.24492	1.92741	1.217			3	1.03288	1.94981	2.54324	1.24833
mean	1.00027	2.29264	1.89686	1.22383			mean	1.00056	1.95437	2.47336	1.24068
SE	0.0230175	0.050178	0.037107	0.0247799			SE	0.0332366	0.0133145	0.209885	0.00589356
Gene Name：GlCS1				Gene Name：GlCS2				Gene Name：GlCS3				Gene Name：GlCS4
	Sample Name				Sample Name				Sample Name				Sample Name
	MY	MY-40			MY	MY-40			MY	MY-40			MY	MY-40
1	0.993092	1.53333		1	1.00541	0.933033		1	1.01318	1.82626		1	1.00696	1.69741
2	0.990801	1.60956		2	0.957788	0.997692		2	1.02259	1.86894		2	1.02574	1.68958
3	1.0163	1.51222		3	1.03846	0.922316		3	0.965193	1.76405		3	0.968171	1.71713
mean	1.00007	1.5517		mean	1.00055	0.951014		mean	1.00032	1.81975		mean	1.00029	1.70137
SE	0.0115207	0.0418096		SE	0.0331124	0.0332953		SE	0.0251333	0.04307		SE	0.0239711	0.011591
Gene Name：GlCS5				Gene Name：GlCS6				Gene Name：GlCS7				Gene Name：GlCS8
	Sample Name				Sample Name				Sample Name				Sample Name
	MY	MY-40			MY	MY-40			MY	MY-40			MY	MY-40
1	1.01866	0.773782		1	1.04488	1.94981		1	1.01162	1.69741		1	1.01396	1.78592
2	0.983957	0.779165		2	1	1.96791		2	1.02101	1.61328		2	0.954842	1.86176
3	0.997692	0.764895		3	0.95705	1.97247		3	0.968171	1.6358		3	1.03288	1.81085
mean	1.0001	0.772614		mean	1.00064	1.9634		mean	1.00027	1.64883		mean	1.00018	1.81951
SE	0.014268	0.0058839		SE	0.035858	0.00978515		SE	0.0230175	0.0355577		SE	0.0332366	0.0315614
